# Supplementary material for: Rates of Mutation and Recombination in Siphoviridae Phage Genome Evolution over Three Decades
Source: PubMed Central journal article supplement — Mol Biol Evol. 2018 Feb 22;35(5):1147–59. doi: 10.1093/molbev/msy027 (PMC5913663; doi:10.1093/molbev/msy027), 2018-02-22
Supplement: msy027_supp.pdf [file msy027_supp.pdf]

Supplementary Information for

## Rates of mutation and recombination in *Siphoviridae* phage genome evolution over three decades

Anne Kupczok, Horst Neve, Kun D. Huang, Marc P. Hoepfner, Knut J. Heller, Charles M. A. P. Franz, Tal Dagan

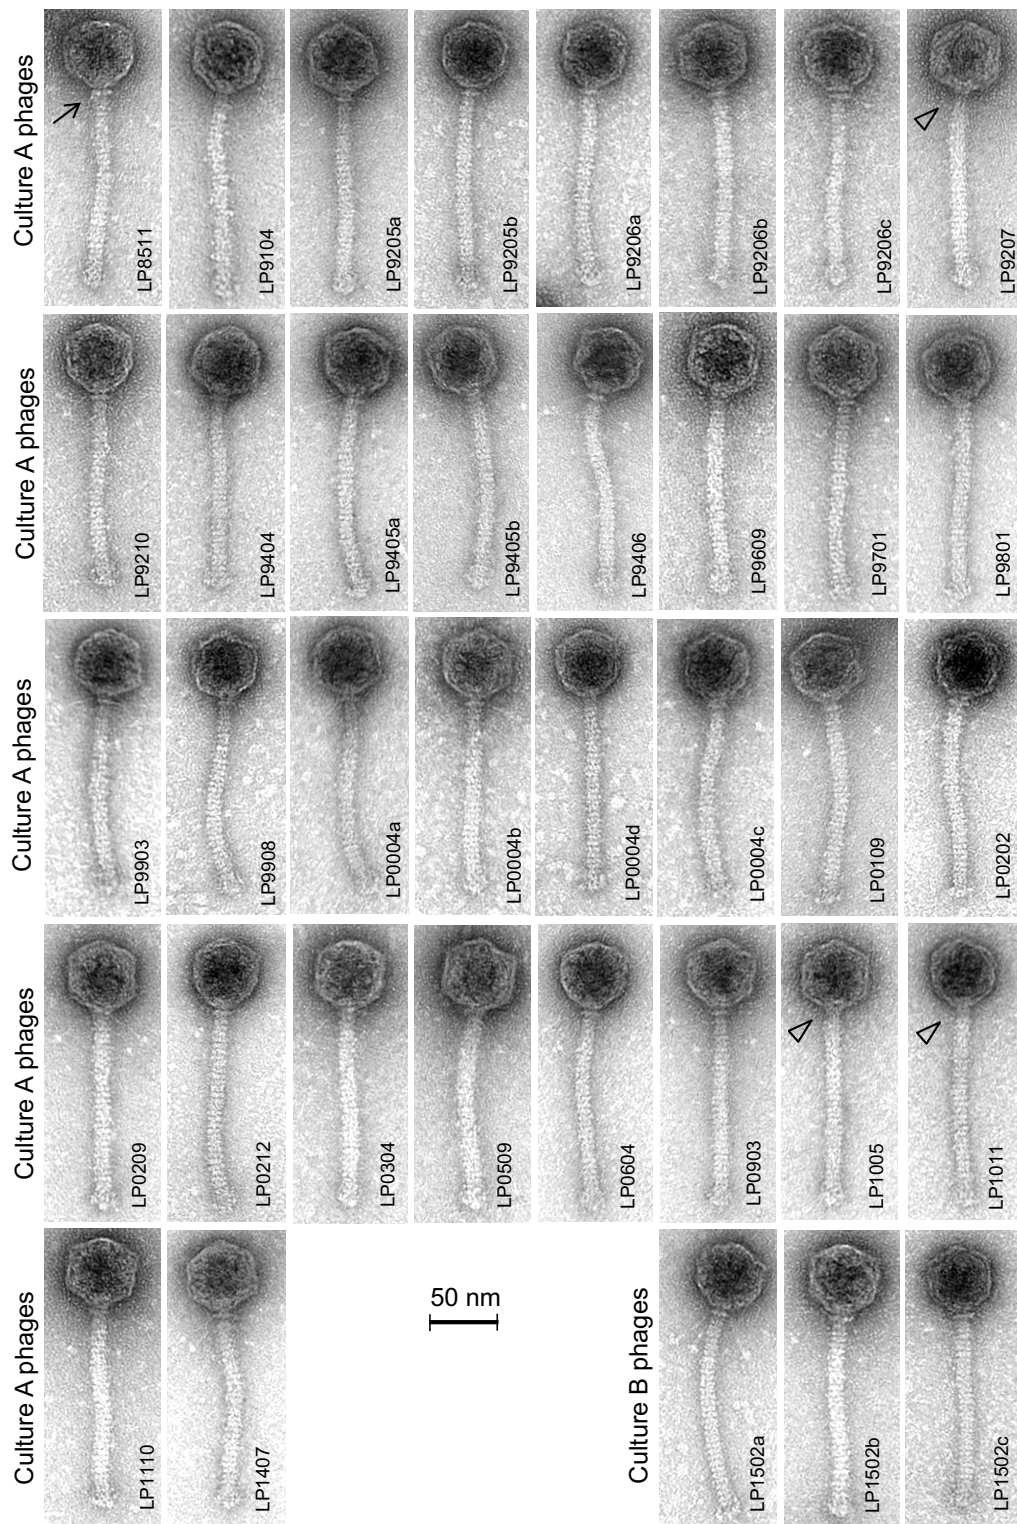

**Figure S1: Electron micrographs of phages sequenced in this study.** Phage names indicate isolation time (in YYMM format). All 34 culture A and all three phages from culture B are members of the lactococcal 936 group of *Siphoviridae* phages with isometric heads (ca. 55 nm diameter) and flexible, non-contractile tails (ca. 160 nm length). Except for few phages,



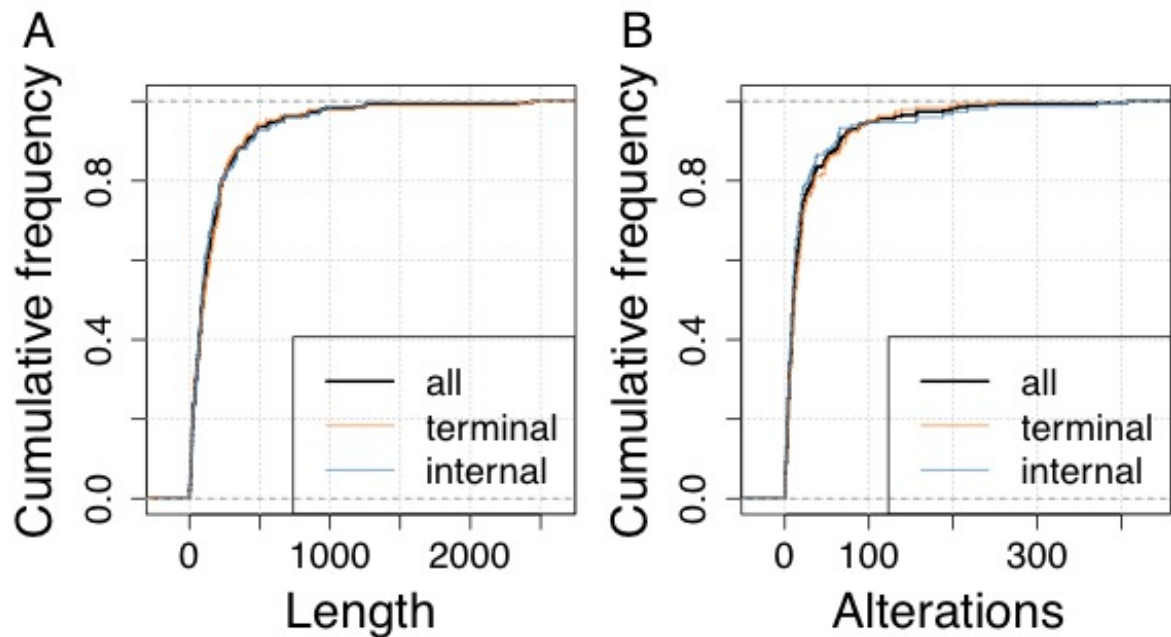

**Figure S3: Recombination statistics.** (A) Length distribution of 345 detected recombined segments, mean=176.9, median=96, no difference between terminal and internal branches ( $p > 0.05$ , Anderson-Darling Test). (B) Distribution of number of nucleotide alterations introduced by one recombination event, mean=26.35, median=11, no difference between terminal and internal nodes ( $p > 0.05$ , Anderson-Darling Test). Sequencing errors in single strains would lead to an overrepresentation of recombination events along terminal branches. Since the distribution of recombination length and altered nucleotides is not significantly different between terminal and internal branches, we can exclude the presence of strain-related artefacts in the data. Posterior mean values of parameters estimated by ClonalFrameML are: ratio of recombination to mutation rate  $R/\theta = 1.247$ , import length  $\delta = 111.2\text{nt}$ , nucleotide distance of imports  $\nu = 0.1694$  differences per nucleotide. Thus, the relative effect of recombination to mutation is  $r/m = (R/\theta) \times \delta \times \nu = 23.50$ .





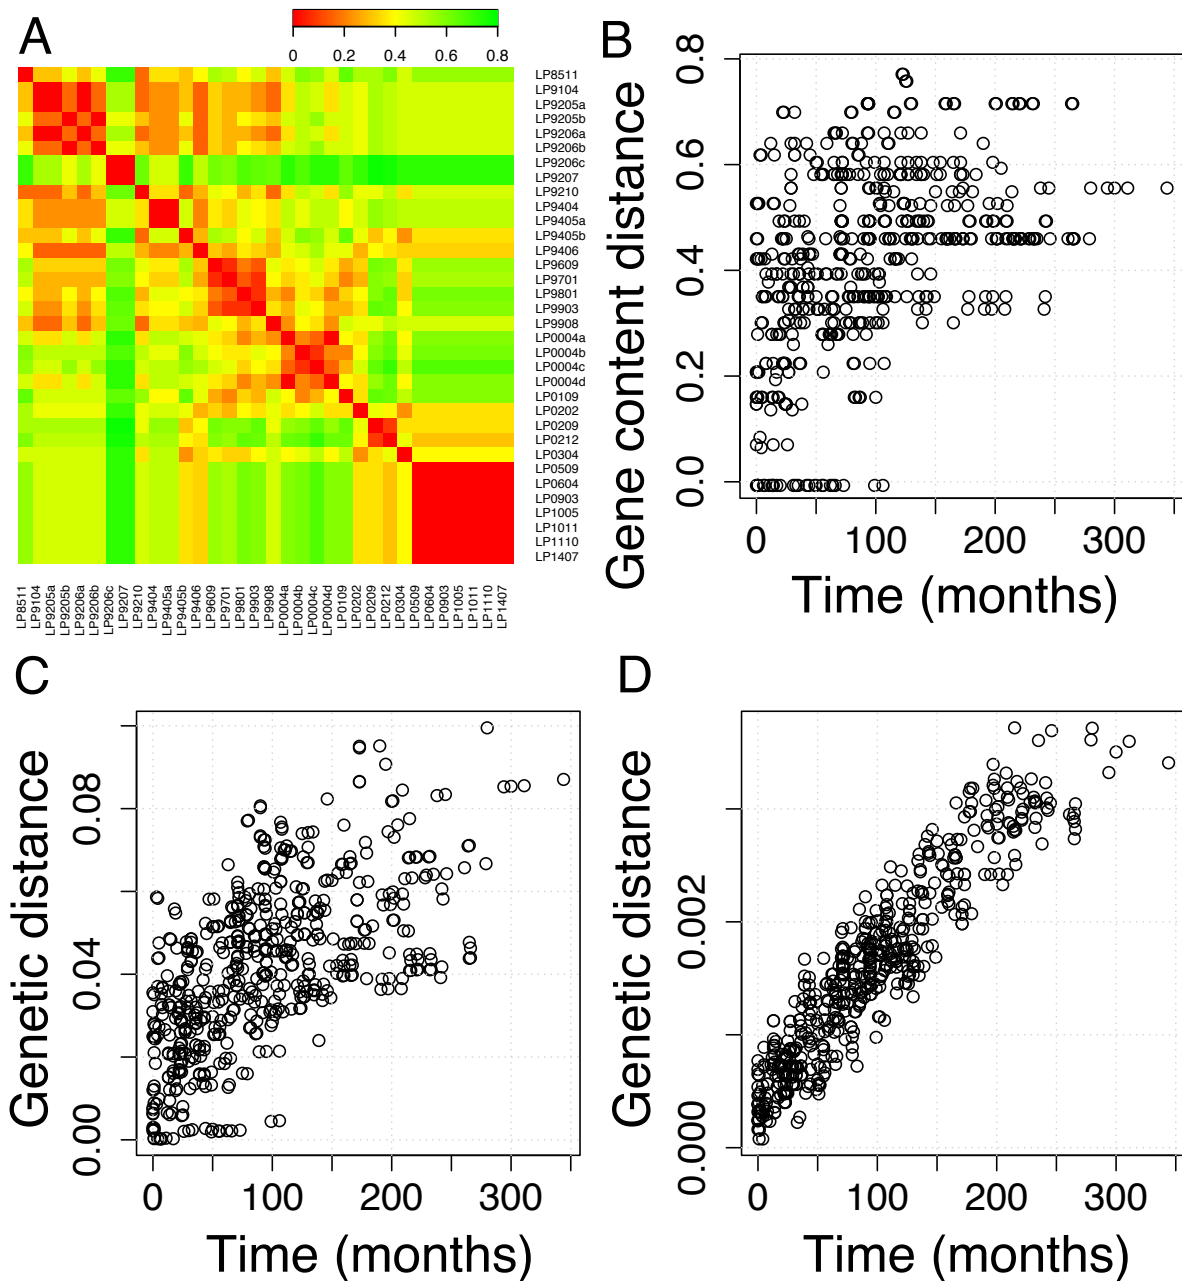

**Figure S5: Gene indel family evolution over time.** (A) Heatmap of pairwise gene content distance based on 25 gene indel families. We observe that the gene content distance is lower between isolates close in time, although there appears to be no gradual change of the gene content distance with time. (B) Pairwise gene content distance against pairwise isolation time differences ( $r^2=0.19$ ). In accordance with a, we observe a weak correlation of pairwise gene content distance with time distance. (C) Pairwise genetic distances based on whole-genome alignment against pairwise isolation time differences ( $r^2=0.39$ ). (D) Genetic distances based on whole-genome alignment after recombination masking against pairwise isolation time differences ( $r^2=0.87$ ). In comparison to the gene content distances, the genetic distances based on the whole-genome alignment have a stronger correlation with time, and this correlation even increased when recombinations were masked.

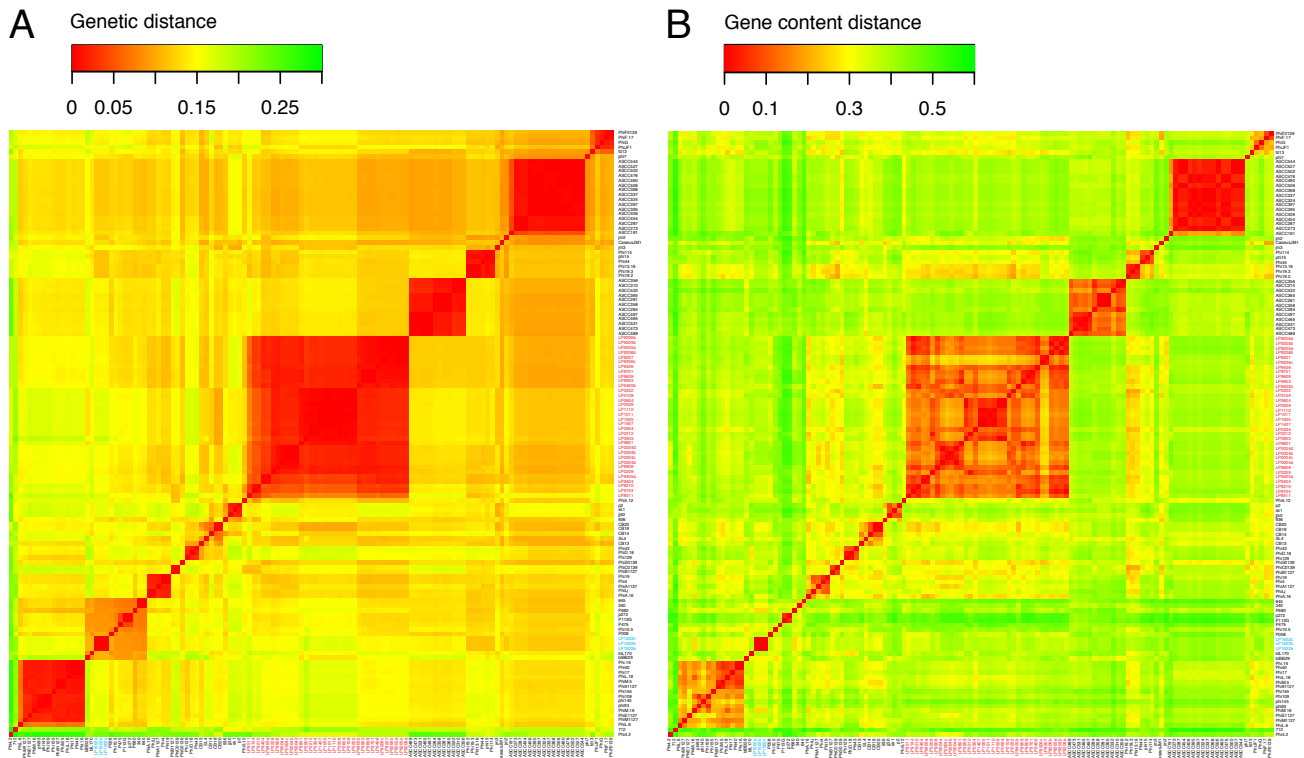

**Figure S6: Heatmap of (A) genetic distances, and (B) gene content distances based on Jaccard index, for all phages of the 936 group.** Genome order is the same in both matrices, based on clustering of genetic distances. Culture A phages are highlighted in red and culture B phages are highlighted in blue.

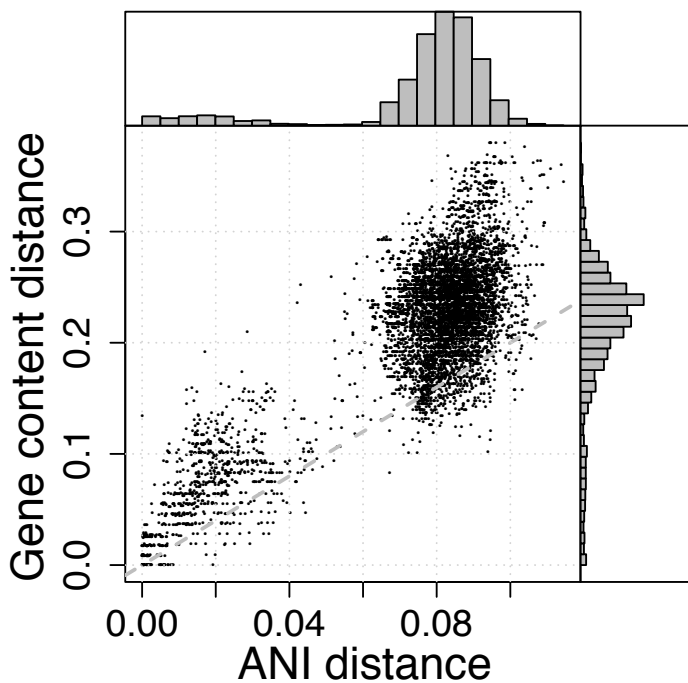

**Figure S7: Association between pairwise gene content distance and ANI distance for all *L. lactis* phages of the 936 group.** Gene content distances are based on the average proportion of shared genes. These statistics are similar to the ones used by (Mavrigh and Hatfull 2017). The clustering pattern observed in Fig. 6 is also observed with this statistic. For an ANI distance cutoff of 0.05, low distance pairs have an average gene content distance of 0.06947 and  $r^2$  of 0.3925 ( $n=881$ ,  $p<10^{-6}$ ), and high distance pairs have an average gene content distance of 0.2331 and  $r^2$  of 0.07739 ( $n=7120$ ,  $p<10^{-6}$ ). We cannot distinguish between phages of high or low gene flux modes (Mavrigh and Hatfull 2017) due to sampling density.

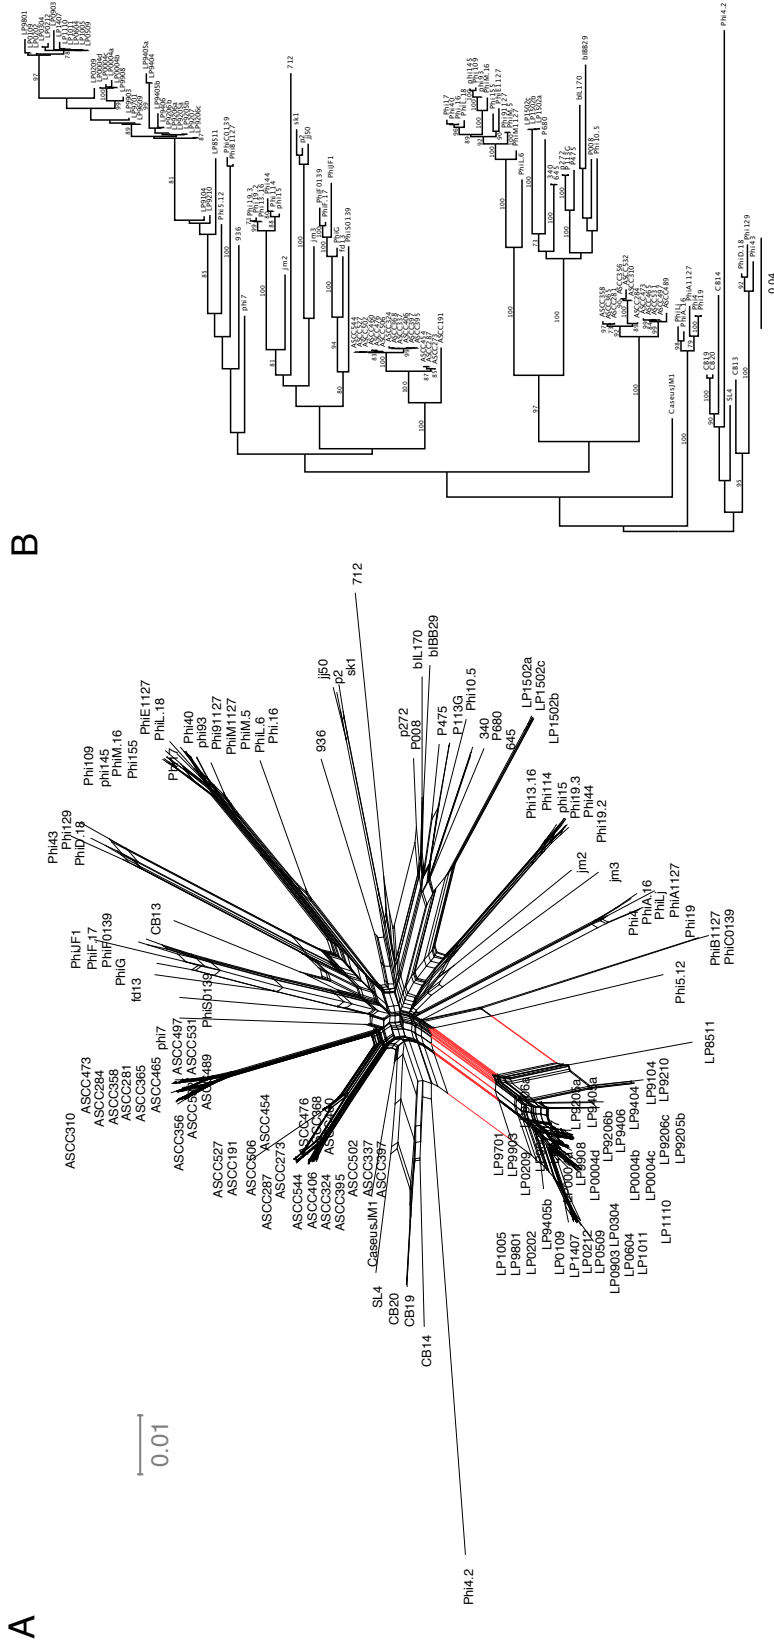

**Figure S8: Relationships of *L. lactis* phages of the 936 group based on core gene alignment.** (A) Neighbor-net based on ordinary least squares distances calculated with SplitsTree (Huson and Bryant 2006). The split that supports the monophyly of culture A phages is marked in red. (B) ML phylogeny, only bootstrap values above 70 are displayed. Note that this is an unrooted tree. Culture A phages are monophyletic in the tree whereas culture B phages group in a notably different region.

A

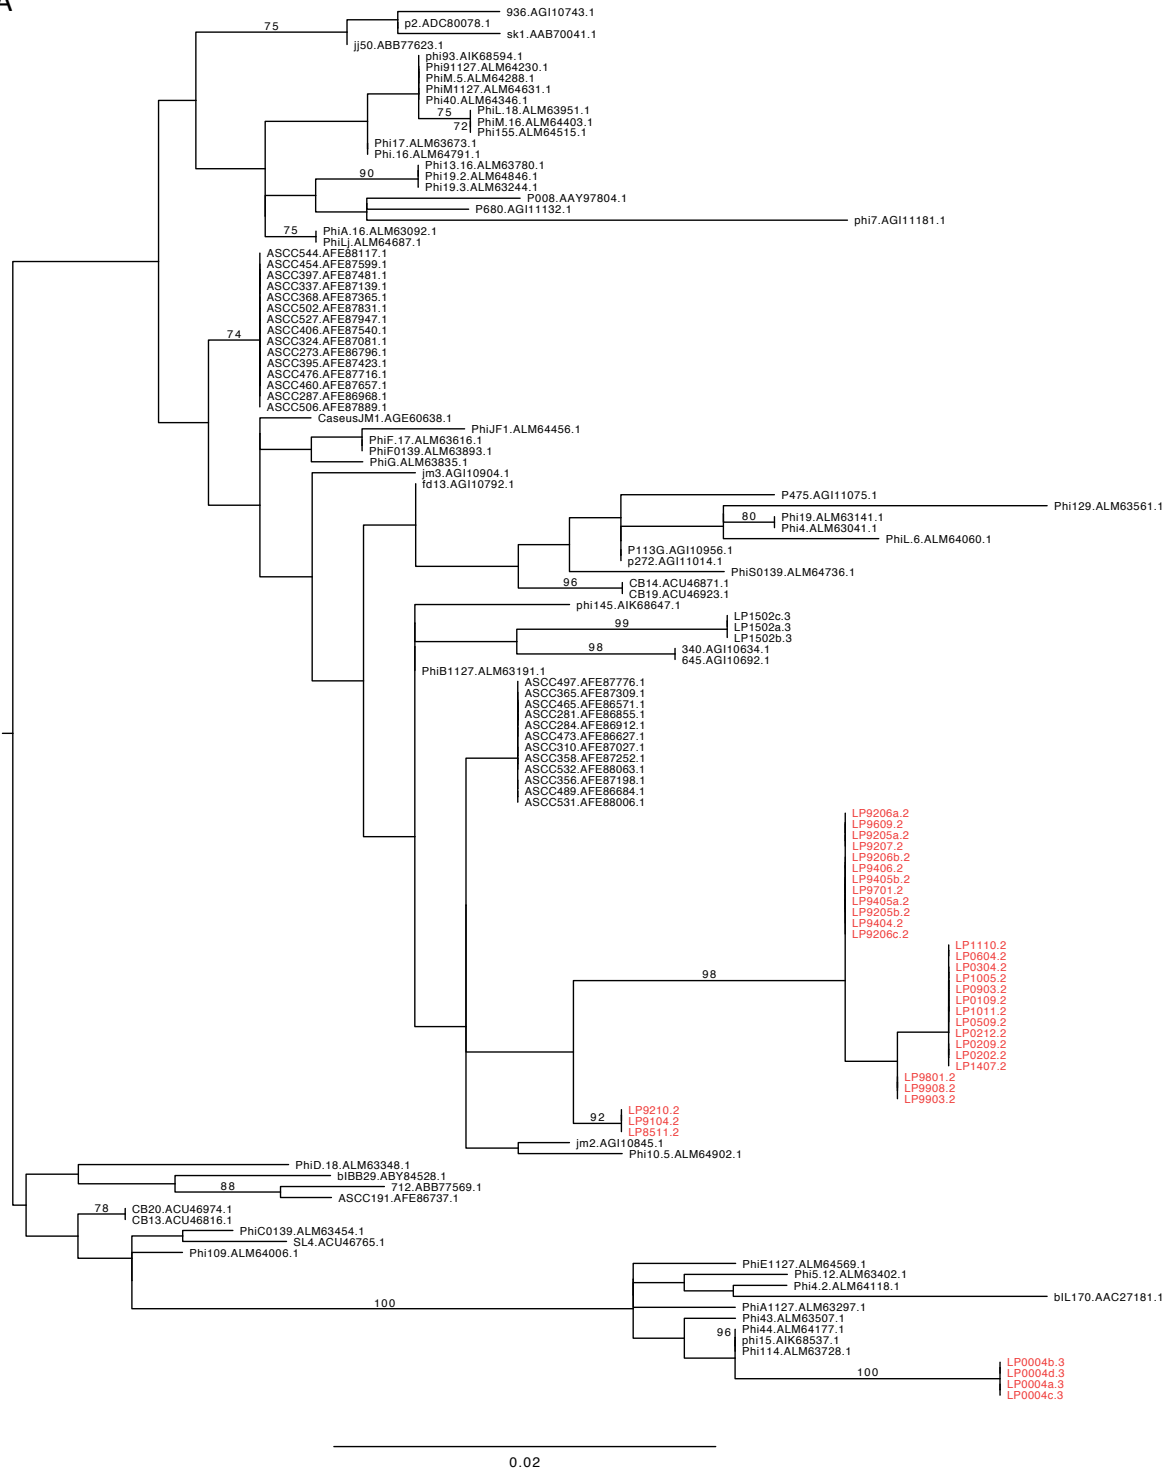

B

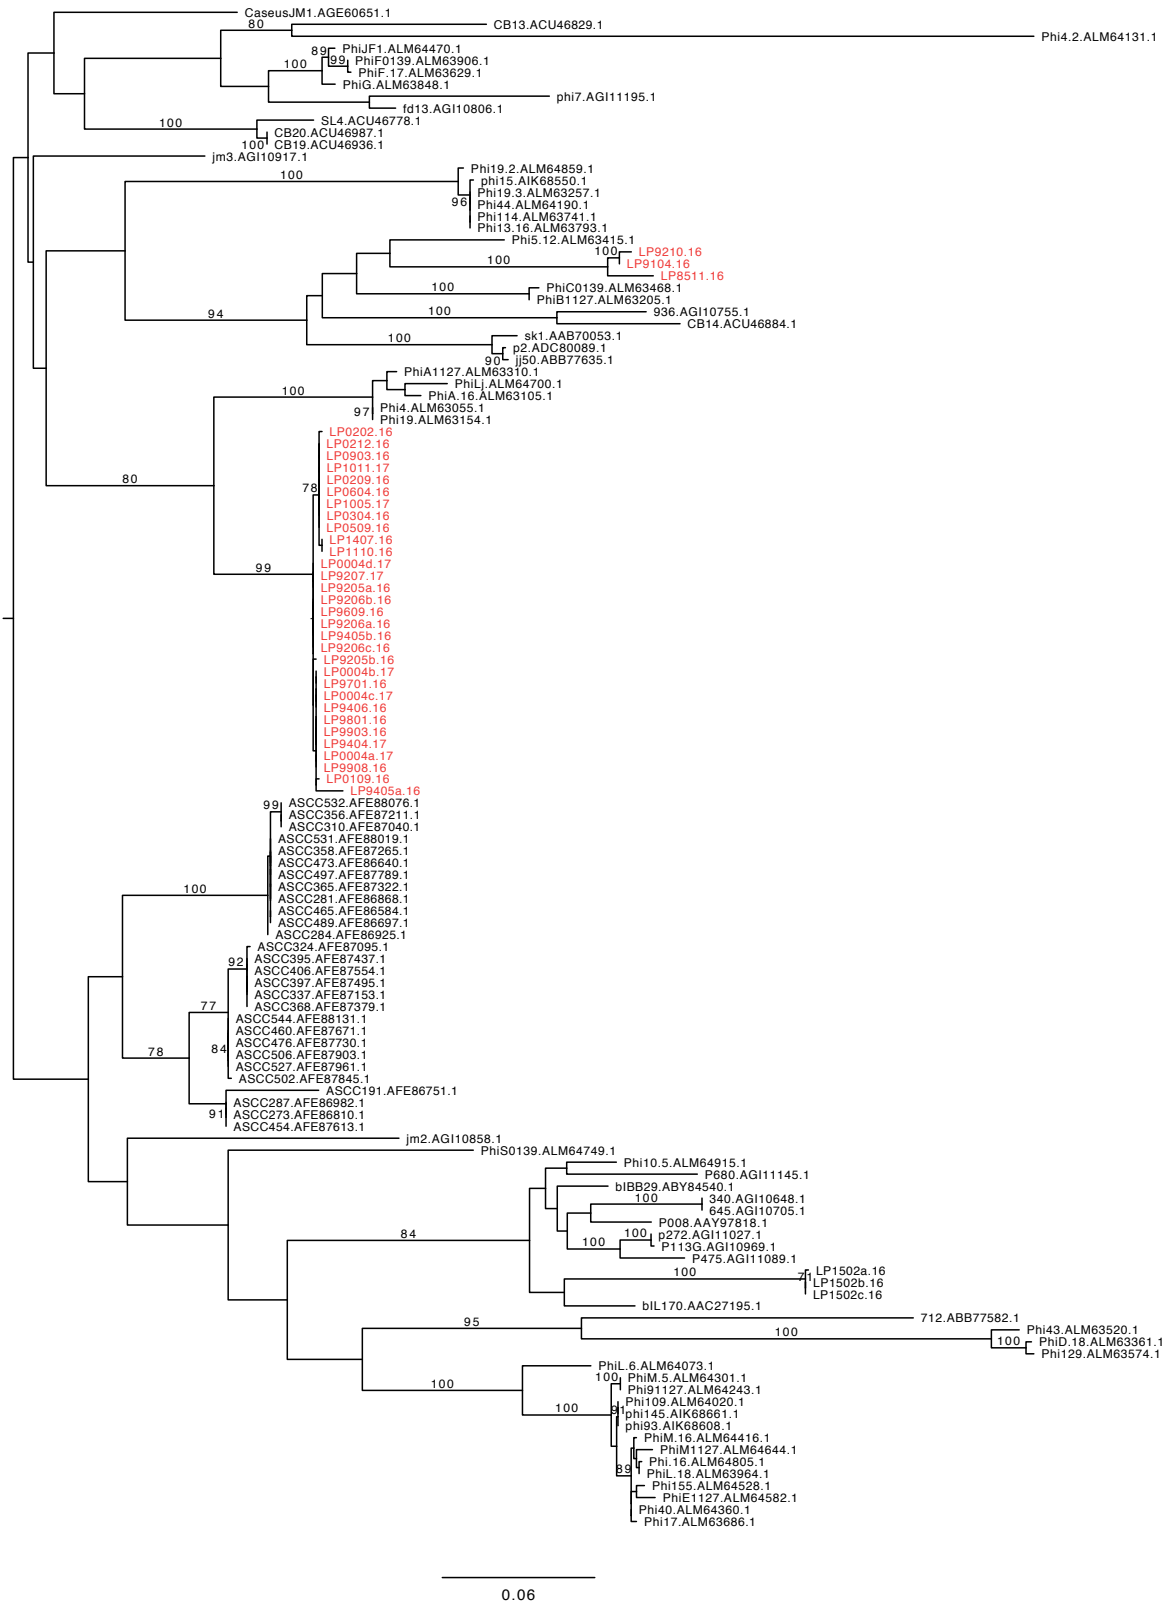

C

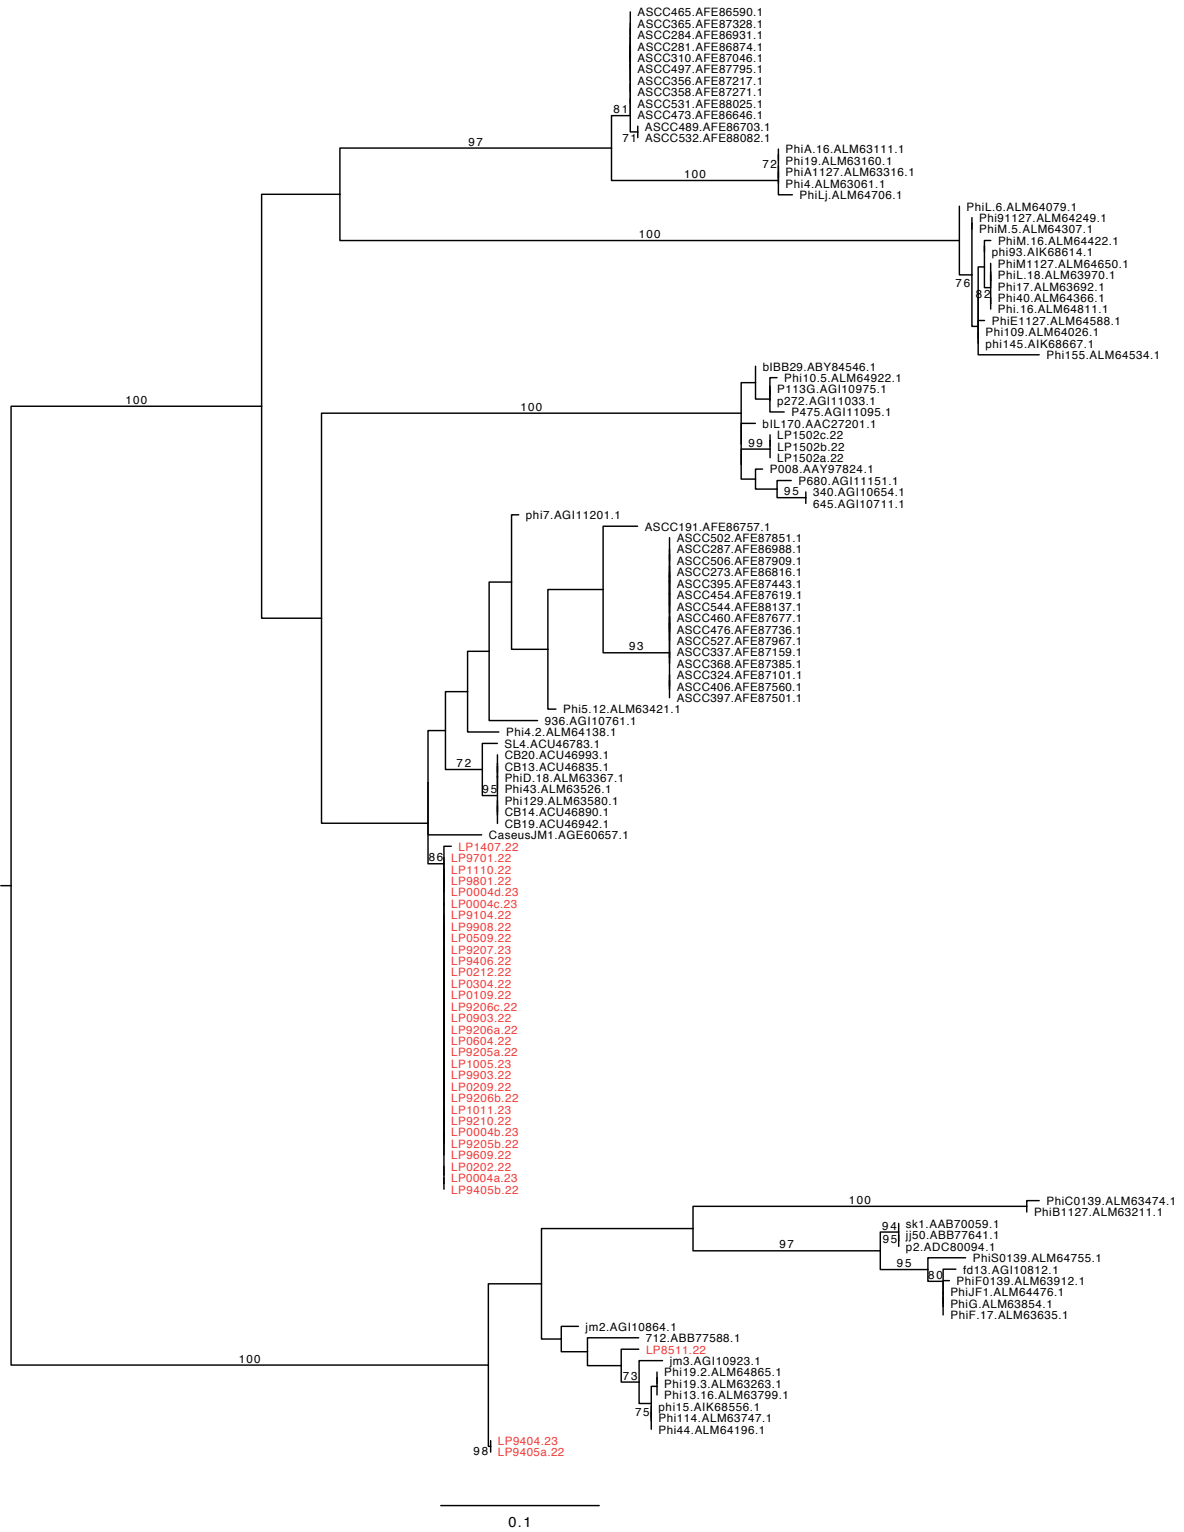



D

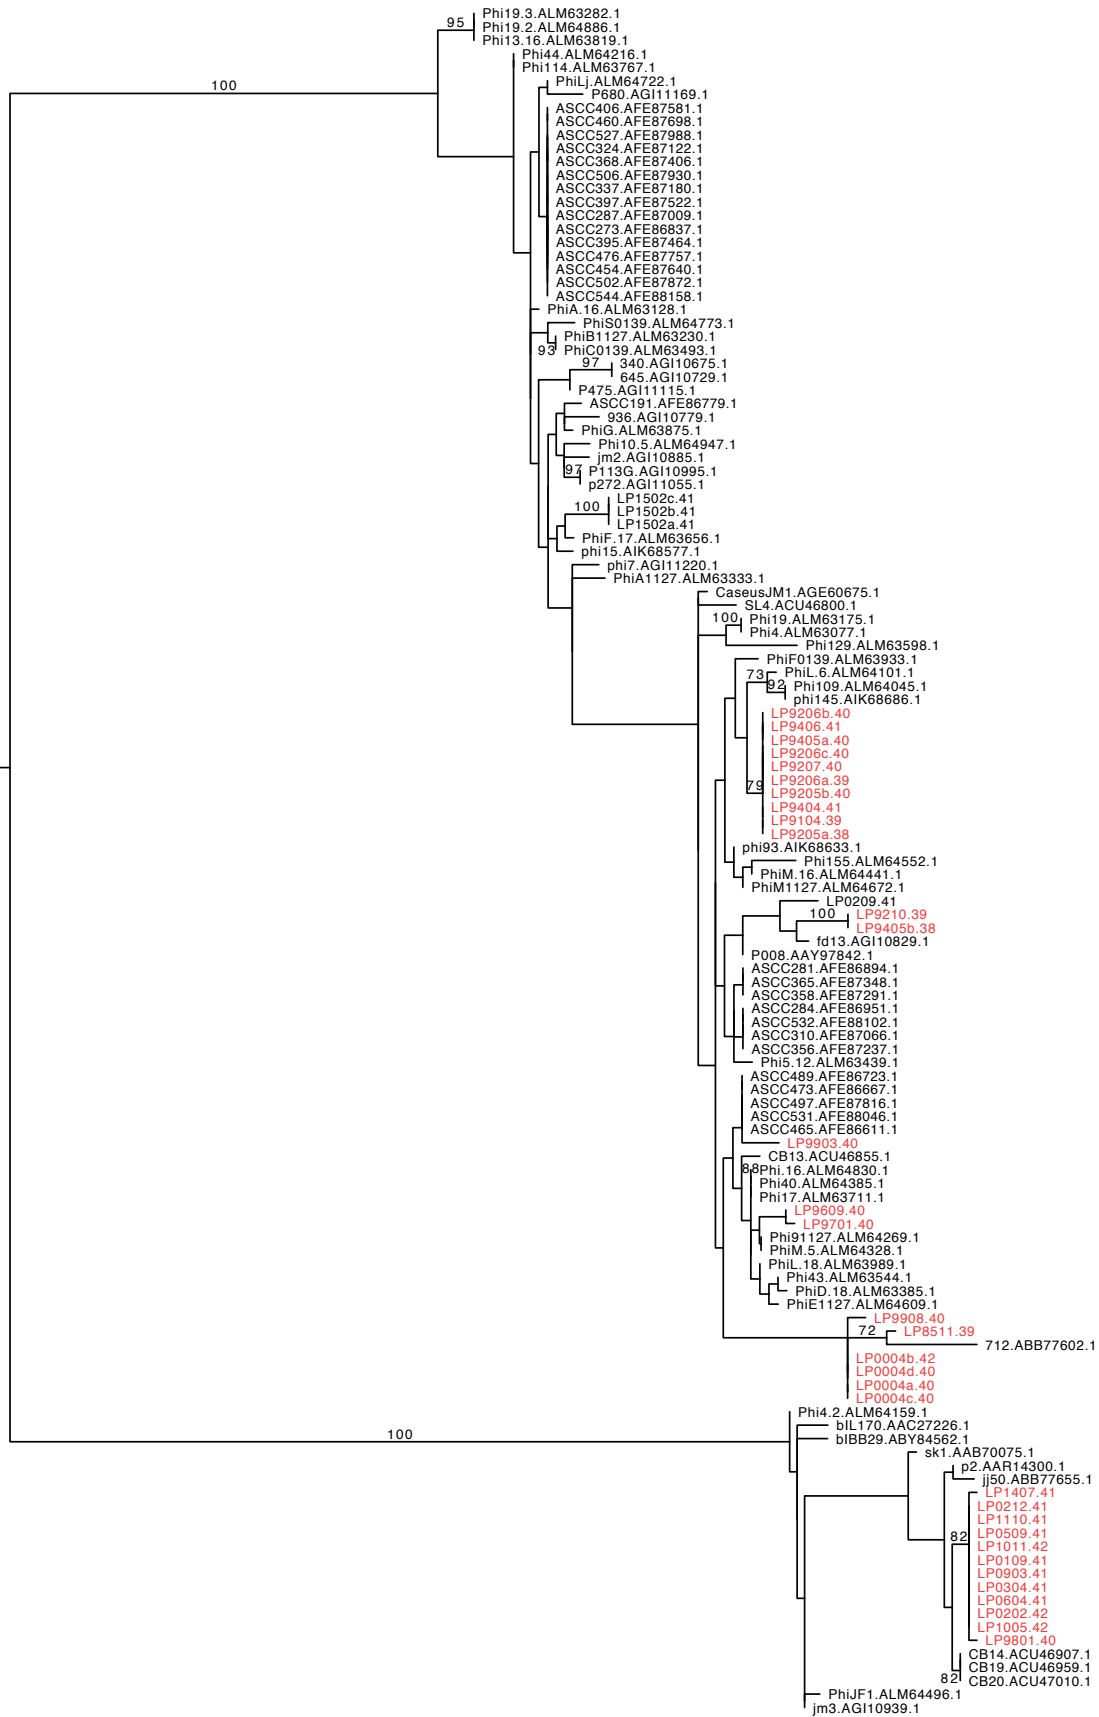

0.2



E

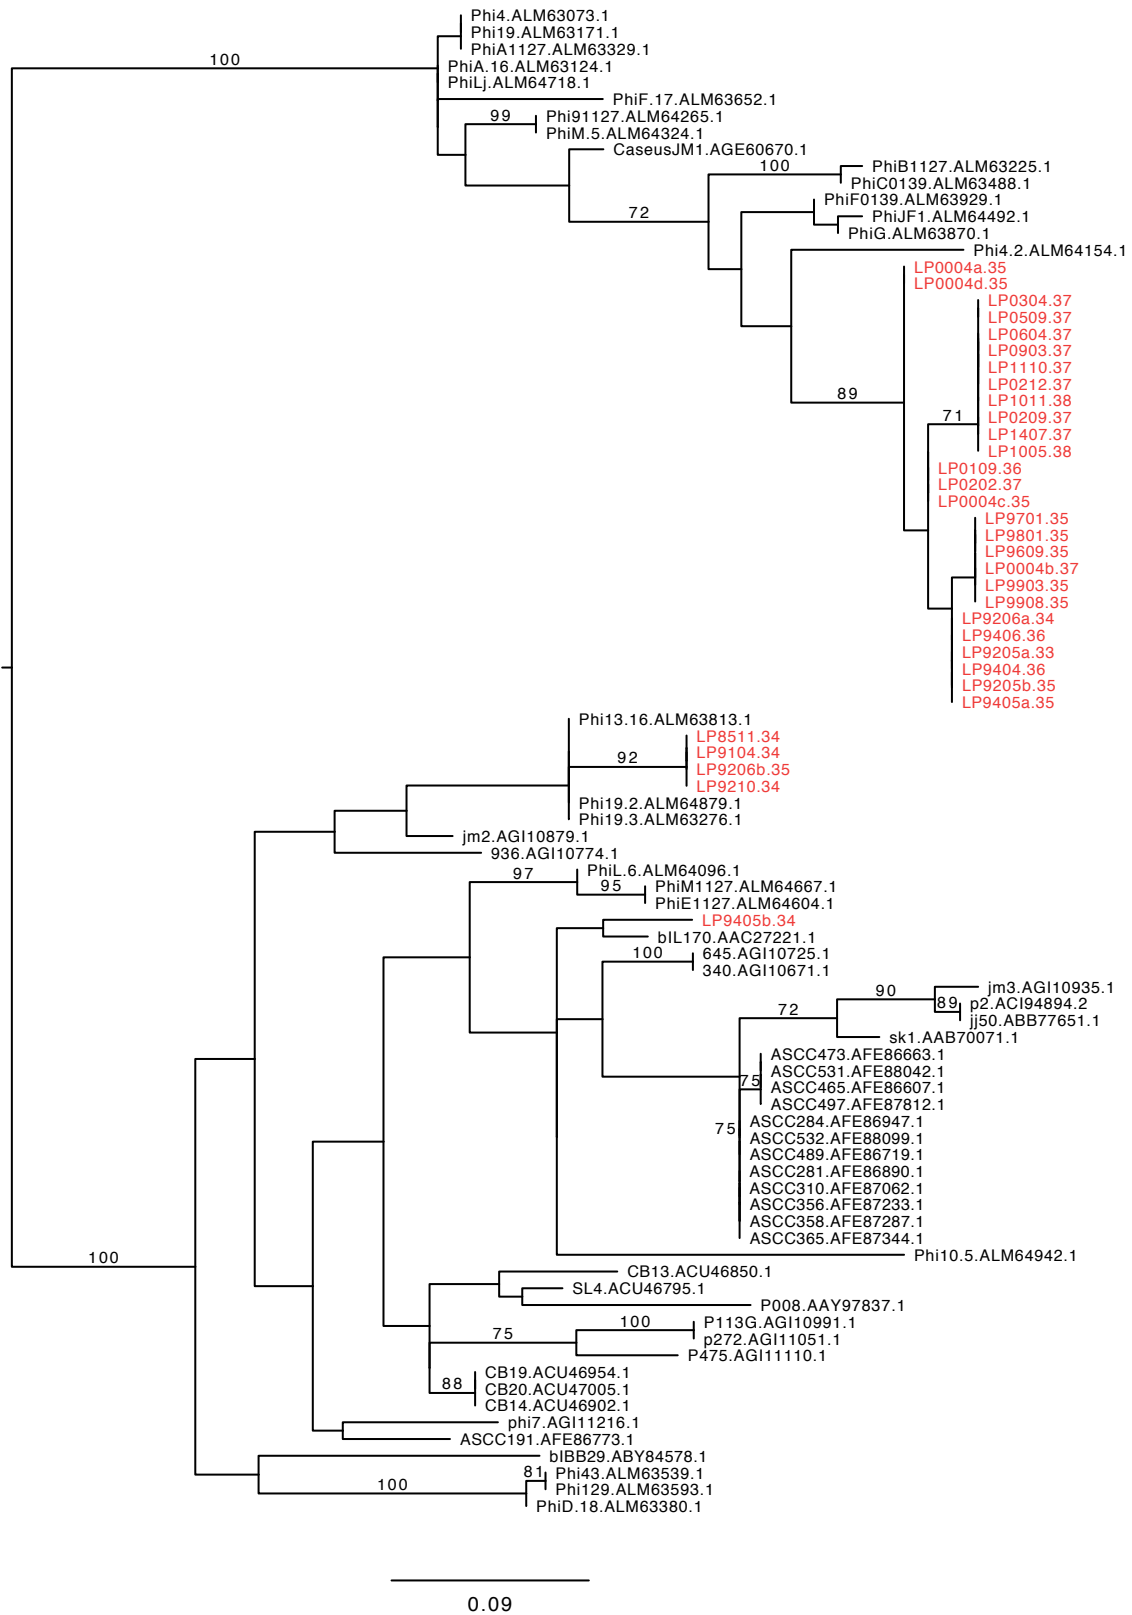

F

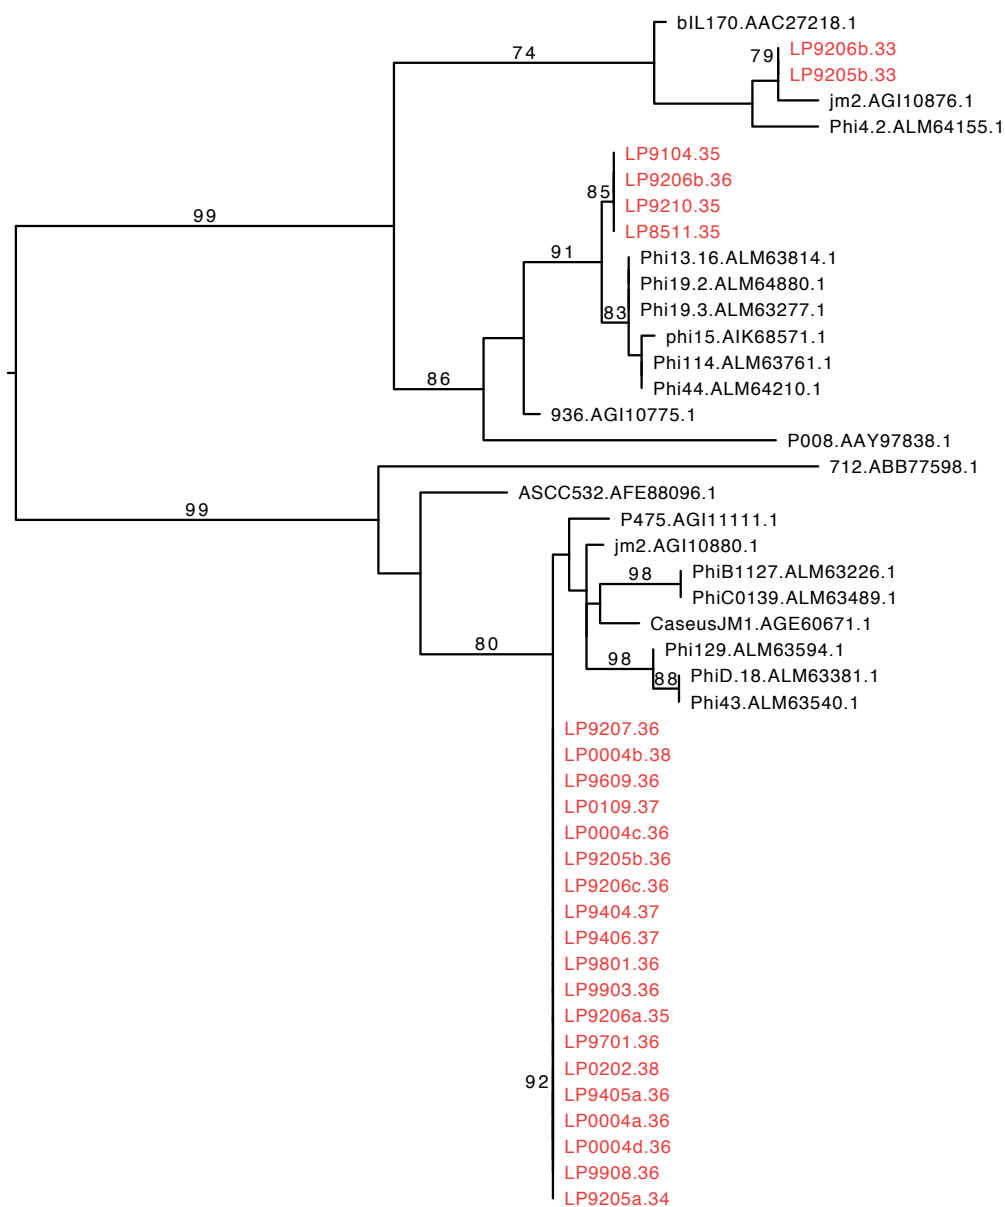

0.08

G

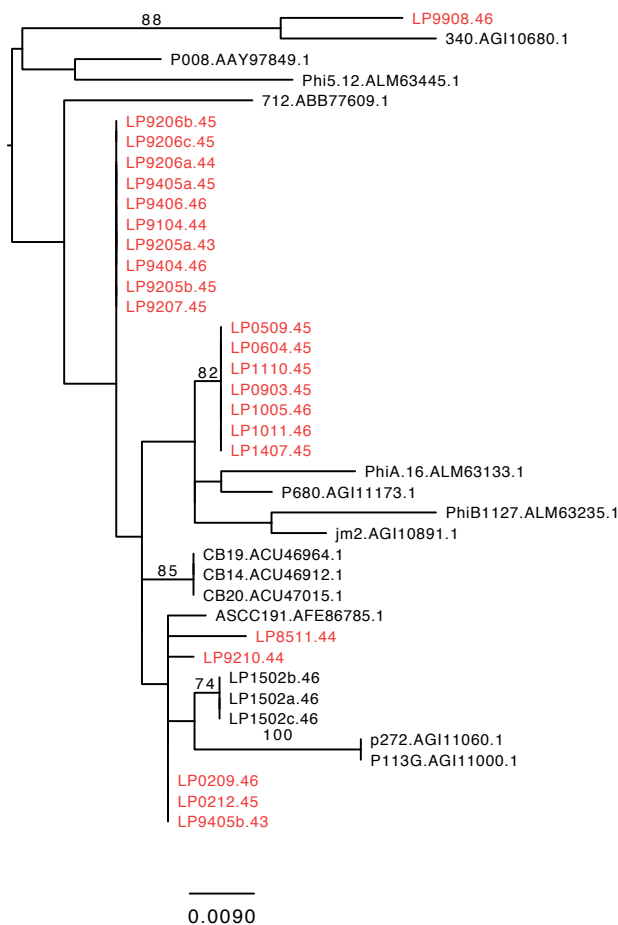

**Figure S9: Gene phylogenies that conflict the monophyly of culture A lactococcal phages.**

All trees are unrooted. Proteins from culture A and culture B phages are labelled by the name and CDS number. Remaining proteins are labelled by name and protein ID. Culture A phages are highlighted in red. Only bootstrap support values above 70 are displayed. All phylogenies are shown where the monophyly of culture A phages is contradicted by a branch with bootstrap support of more than 70. (A) Family 2 – Phage terminase, large subunit. (B) Family 16 – Phage tail length tape measure protein. (C) Family 22 – Phage lysin. (D) Family 31 – Sak3. Family 31 shows similarity to ORF35 from phage p2 (blastp e-value $\leq 2 \times 10^{-64}$ ) that was described as Sak3 (Bouchard and Moineau 2004). Sak3 is a DNA-single strand annealing protein involved in homologous recombination (Bouchard and Moineau 2004; Scaltriti et al. 2011). Sequences from family 31 were also detected as homologous to the eukaryotic recombination protein Rad52 using virfam (Lopes et al. 2010). Proteins from the Rad52 family promote recombination between phages and prophages by facilitating homologous recombination between divergent sequences (De Paepe et al. 2014). The alignment exhibits a high amount of conflict as displayed by the split network (Fig. S10A). The conflict can be traced back to different regions of the protein (Fig. S10). (E) Family 60 – conserved hypothetical protein. (F) Family 61 – HNH homing endonuclease. (G) Family 66 – DNA polymerase. Two protein families (64,66) are predicted to function as DNA polymerases, but they show less than 50% global protein identity. Exactly one gene from each family is present in each isolate of culture A phages at a conserved genomic location. In addition, family 66 shows a conflicting phylogeny. This implies the frequent exchange of multiple versions of DNA polymerase between phages of the 936 group.

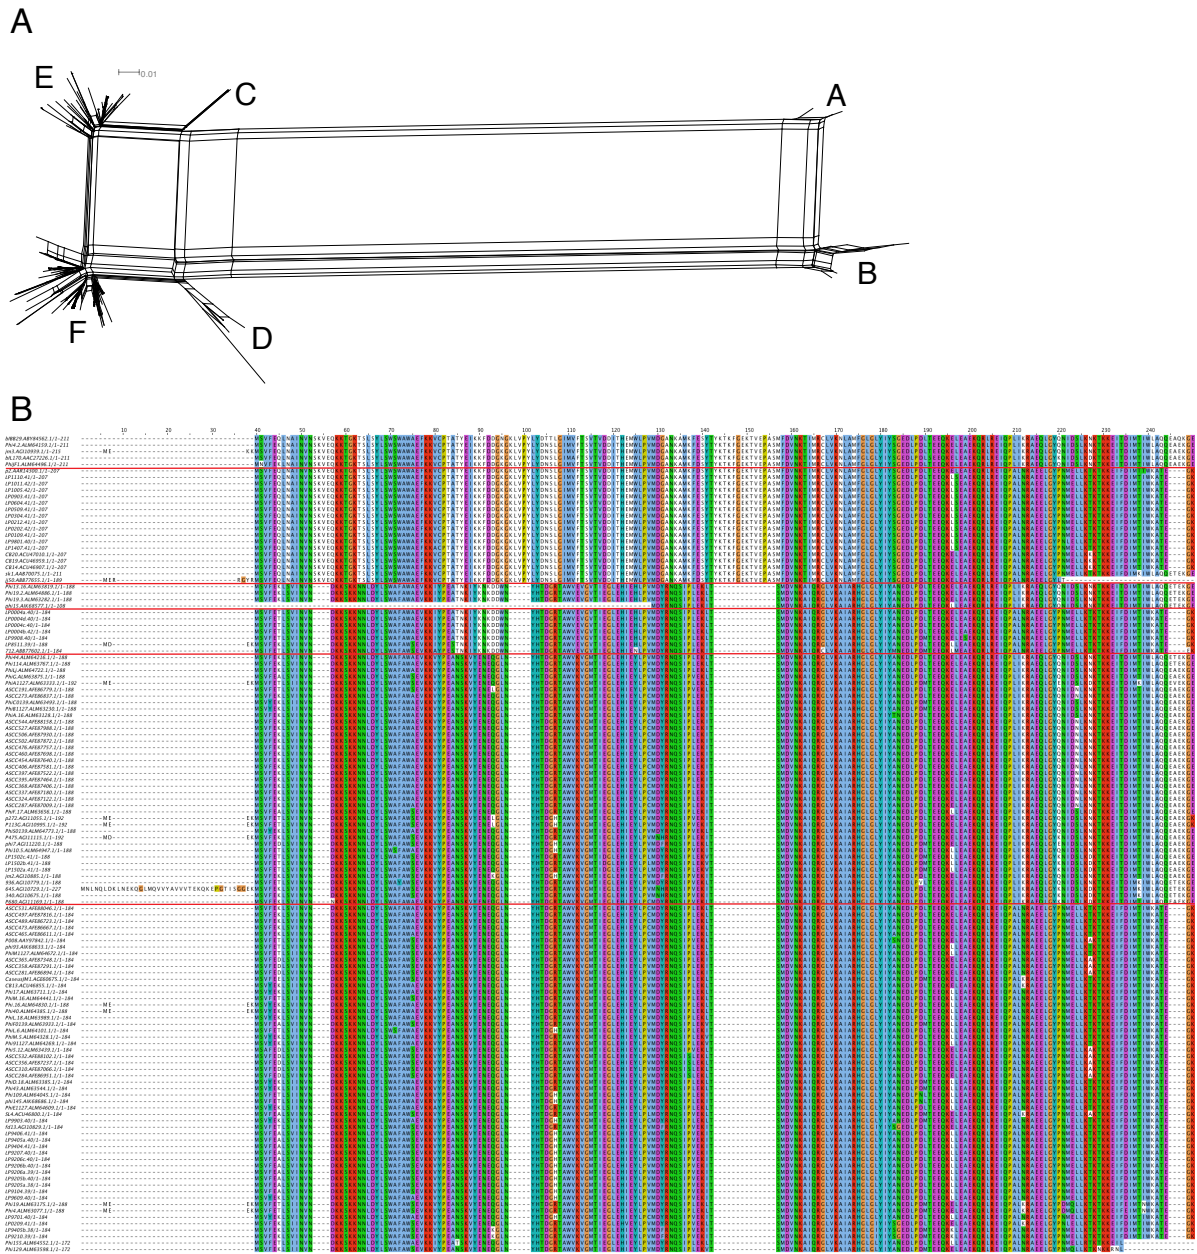

**Figure S10: Alignment of Sak3 proteins from phages of the 936 group.** (A) Neighbor-net based on ordinary least squares distances calculated with SplitsTree (Huson and Bryant 2006). (B) Alignment delimited into the taxon groups A, B, C, D, E, and F (top to bottom) as marked in the neighbor-net. Differences that split taxa A and B from the rest can be found in the N-terminal region (alignment positions 40-184), whereas differences that split taxa A, C, and E from B, D, and F can be found in the C-terminal region (alignment positions 212-250). ORF35 from phage p2 belongs to group B. Its N-terminal region contains the domains for oligomerization, DNA binding, and the motifs for ATPase activity that are important for the stimulation of RecA, whereas its C-terminal region might constitute the interaction domain with RecA (Scaltriti et al. 2011).



**Table S1: Protein families.**

| Protein Family | Samples | Alignment length | % Recombination | Type       | Annotation                                            | Annotation evidence                     |
|----------------|---------|------------------|-----------------|------------|-------------------------------------------------------|-----------------------------------------|
| 1              | 34      | 174              | 7.5%            | core (all) | Phage terminase, small subunit                        | RAST                                    |
| 2              | 34      | 540              | 72.0%           | core (all) | Phage terminase, large subunit                        | RAST                                    |
| 3              | 34      | 94               | 0.0%            | core (all) | Phage-associated homing endonuclease                  | RAST                                    |
| 4              | 34      | 378              | 0.0%            | core (all) | Phage portal protein                                  | RAST                                    |
| 5              | 34      | 178              | 100.0%          | core (all) | Putative capsid maturation protein                    | Similarity to YP_762516.1               |
| 6              | 34      | 393              | 100.0%          | core (all) | Major capsid protein                                  | Similarity to ALM64064.1                |
| 7              | 34      | 87               | 0.0%            | core (all) | Conserved hypothetical protein                        |                                         |
| 8              | 34      | 104              | 0.0%            | core (all) | Probable head completion protein 1                    | Similarity to HCP1_BPLSK                |
| 9              | 34      | 113              | 0.0%            | core (all) | Probable head completion protein 2                    | Similarity to HCP2_BPLSK                |
| 10             | 34      | 121              | 0.0%            | core (all) | Probable tail terminator protein                      | Similarity to TTTP_BPLSK                |
| 11             | 34      | 656              | 33.8%           | core       | Neck passage structure                                | RAST, Similarity to ANS02693.1          |
| 12             | 34      | 301              | 72.1%           | core (all) | Major tail protein                                    | Similarity to ALM63411.1                |
| 13             | 34      | 228              | 71.5%           | core       | Tail protein extension                                | Similarity to ALM63412.1                |
| 14             | 34      | 91               | 0.0%            | core (all) | Probable chaperone for the tape measure protein       | Similarity to GP12_BPLSK                |
| 15             | 34      | 170              | 100.0%          | core (all) | Conserved hypothetical protein                        |                                         |
| 16             | 34      | 919              | 44.0%           | core (all) | Phage tail length tape measure protein                | RAST                                    |
| 17             | 34      | 460              | 0.0%            | core (all) | Distal tail protein                                   | Similarity to ALM64750.1                |
| 18             | 34      | 379              | 0.0%            | core       | Tail associated lysin                                 | Similarity to ALM63688.1                |
| 19             | 34      | 97               | 0.0%            | core       | Conserved hypothetical protein                        |                                         |
| 20             | 34      | 264              | 0.0%            | core       | Putative receptor binding protein                     | Similarity to AAT81500.1                |
| 21             | 34      | 117              | 0.0%            | core (all) | Phage holin                                           | RAST                                    |
| 22             | 34      | 263              | 3.8%            | core (all) | Phage lysin                                           | RAST                                    |
| 23             | 34      | 89               | 1.1%            | core (all) | Putative transglycolase                               | Phagocyte based on similarity to sk1p21 |
| 24             | 34      | 115              | 58.3%           | core (all) | Conserved hypothetical protein                        |                                         |
| 25             | 34      | 62               | 100.0%          | core       | Conserved hypothetical protein                        |                                         |
| 26             | 34      | 102              | 100.0%          | core       | SaV protein                                           | Similarity to SAV_BPLSK                 |
| 27             | 34      | 39               | 100.0%          | core       | Conserved hypothetical protein                        |                                         |
| 28             | 34      | 172              | 100.0%          | core       | Conserved hypothetical protein                        |                                         |
| 29             | 34      | 71               | 100.0%          | core (all) | Conserved hypothetical protein                        |                                         |
| 30             | 34      | 119              | 100.0%          | core (all) | Single stranded DNA-binding protein, phage associated | RAST                                    |
| 31             | 34      | 211              | 77.7%           | core (all) | Sak3                                                  | Similarity to ALM64385.1                |
| 32             | 34      | 94               | 100.0%          | core       | Conserved hypothetical protein                        |                                         |
| 33             | 34      | 96               | 100.0%          | core       | Conserved hypothetical protein                        |                                         |
| 34             | 34      | 90               | 100.0%          | core       | Conserved hypothetical protein                        |                                         |
| 35             | 34      | 73               | 100.0%          | core       | Conserved hypothetical protein                        |                                         |

| Protein Family | Samples  | Alignment length | % Recombination | Type       | Annotation                              | Annotation evidence          |
|----------------|----------|------------------|-----------------|------------|-----------------------------------------|------------------------------|
| 36             | 34       | 56               | 100.0%          | core       | Conserved hypothetical protein          |                              |
| 37             | 34       | 75               | 100.0%          | core       | Conserved hypothetical protein          |                              |
| 38             | 34       | 43               | 0.0%            | core (all) | Conserved hypothetical protein          |                              |
| 39             | 34       | 160              | 16.3%           | core (all) | Putative holliday junction endonuclease | Similarity to YP_762566.1    |
| 40             | 34       | 55               | 0.0%            | core       | Conserved hypothetical protein          |                              |
| 41             | 4        | 153              | 0.0%            | gene indel | HNH homing endonuclease                 | RAST                         |
| 42             | 1        | -                | -               | nonsense   | Neck passage structure                  | RAST                         |
| 43             | 1        | -                | -               | nonsense   | Neck passage structure                  | RAST                         |
| 44             | 1        | -                | -               | nonsense   | Neck passage structure                  | RAST                         |
| 45             | 1        | -                | -               | nonsense   | Neck passage structure                  | RAST                         |
| 46             | 1        | -                | -               | gene indel | Putative lytic transglycosylase         | Similarity to YP_002004010.1 |
| 47             | 31       | 53               | 0.0%            | gene indel | Putative lytic transglycosylase         | Similarity to B3TJQ7_9CAUD   |
| 48             | 19       | 59               | 0.0%            | nonsense   | Conserved hypothetical protein          |                              |
| 49             | 33       | 56               | 100.0%          | nonsense   | Conserved hypothetical protein          |                              |
| 50             | 7        | 82               | 100.0%          | gene indel | Conserved hypothetical protein          |                              |
| 51             | 31       | 86               | 100.0%          | gene indel | Conserved hypothetical protein          |                              |
| 52             | 13       | 81               | 0.0%            | gene indel | Conserved hypothetical protein          |                              |
| 53             | 32       | 220              | 0.0%            | gene indel | Methylase                               | Similarity to WP_062806946.1 |
| 54             | 2        | 107              | 0.0%            | gene indel | Conserved hypothetical protein          |                              |
| 55             | 2        | 116              | 0.0%            | gene indel | Putative excisionase                    | Similarity to A5GZ54_9CAUD   |
| 56             | 2        | 45               | 0.0%            | nonsense   | Methylase                               | Similarity to ALM64768.1     |
| 57             | 22       | 325              | 70.2%           | gene indel | Methylase                               | Similarity to ALM64939.1     |
| 58             | 30       | 82               | 37.8%           | gene indel | Conserved hypothetical protein          |                              |
| 59             | 32       | 57               | 0.0%            | gene indel | Conserved hypothetical protein          |                              |
| 60             | 32       | 109              | 100.0%          | gene indel | Conserved hypothetical protein          |                              |
| 61             | 23 (25)* | 147              | 100.0%          | gene indel | HNH homing endonuclease                 | RAST                         |
| 62             | 11       | 169              | 100.0%          | gene indel | HNH homing endonuclease                 | RAST                         |
| 63             | 20       | 60               | 33.3%           | gene indel | Conserved hypothetical protein          |                              |
| 64             | 11       | 316              | 2.8%            | gene indel | DNA Polymerase                          | Similarity to AIK68583.1     |
| 65             | 5        | 145              | 0.0%            | gene indel | HNH homing endonuclease                 | RAST                         |
| 66             | 23       | 298              | 100.0%          | gene indel | DNA polymerase                          | Similarity to YP_008320131.1 |
| 67             | 7        | 153              | 0.0%            | gene indel | Phage anti-repressor protein            | RAST                         |
| 68             | 4        | 54               | 0.0%            | nonsense   | Phage anti-repressor protein            | RAST                         |
| 69             | 7        | 81               | 0.0%            | gene indel | Conserved hypothetical protein          |                              |
| 70             | 5        | 42               | 0.0%            | nonsense   | Conserved hypothetical protein          |                              |
| 71             | 18       | 48               | 0.0%            | gene indel | Conserved hypothetical protein          |                              |
| 72             | 1        | -                | -               | gene indel | HNH homing endonuclease                 | RAST                         |
| 73             | 32       | 62               | 100.0%          | gene indel | Conserved hypothetical protein          |                              |
| 74             | 2        | 163              | 0.0%            | gene indel | HNH homing endonuclease                 | RAST                         |

Alignment length is the length of the protein alignment. Type marks core families of culture A phages and core families of all phages of the 936 group are denoted as "core (all)". One family (marked \*) occurs two times in two strains, thus the total number of sequences in the family is given in brackets.



**Table S2: Substitution rate estimation with BEAST.**

| Data set                         | Model | Clock model        | Population model          | Substitution rate estimate [95% HPD interval] in substitutions/site/year | Marginal likelihood | Bayes factor |
|----------------------------------|-------|--------------------|---------------------------|--------------------------------------------------------------------------|---------------------|--------------|
| Masked whole-genome alignment    | 1     | strict             | constant                  | 1.888 [1.470-2.317] x 10 <sup>-4</sup>                                   | -22798.77           | 0            |
| Masked whole-genome alignment    | 2     | strict             | exponential               | 1.890 [1.489-2.330] x 10 <sup>-4</sup>                                   | -22800.48           | -1.715       |
| Masked whole-genome alignment    | 3     | strict             | Bayesian Skyline          | 1.900 [1.464-2.317] x 10 <sup>-4</sup>                                   | -22798.89           | -0.1258      |
| Masked whole-genome alignment    | 4     | strict             | Extended Bayesian Skyline | 1.889 [1.460-2.331] x 10 <sup>-4</sup>                                   | -22798.29           | 0.4780       |
| Masked whole-genome alignment    | 5     | Lognormal          | constant                  | 1.915 [1.486-2.371] x 10 <sup>-4</sup>                                   | -22803.45           | -4.683       |
| Masked whole-genome alignment    | 6     | Random local clock | constant                  | 1.889 [1.479-2.342] x 10 <sup>-4</sup>                                   | -22821.26           | -22.49       |
| Core codon alignment             | 1     | strict             | constant                  | 1.737 [1.329-2.143] x 10 <sup>-4</sup>                                   | -                   | -            |
| Core codon alignment, position 1 | 1     | strict             | constant                  | 1.494 [0.9759-2.087] x 10 <sup>-4</sup>                                  | -                   | -            |
| Core codon alignment, position 2 | 1     | strict             | constant                  | 0.8751 [0.5001-1.264] x 10 <sup>-4</sup>                                 | -                   | -            |
| Core codon alignment, position 3 | 1     | strict             | constant                  | 2.887 [2.107 - 3.770] x 10 <sup>-4</sup>                                 | -                   | -            |
| Core codon alignment, position 1 | 6     | Random local clock | constant                  | 1.525 [0.9690-2.105] x 10 <sup>-4</sup>                                  | -                   | -            |
| Core codon alignment, position 2 | 6     | Random local clock | constant                  | 0.8892 [0.5160-1.301] x 10 <sup>-4</sup>                                 | -                   | -            |
| Core codon alignment, position 3 | 6     | Random local clock | constant                  | 2.927 [2.148 - 3.823] x 10 <sup>-4</sup>                                 | -                   | -            |

Substitution rate estimate is mean rate for lognormal and random local clock models. Bayes factors compare H1 to H0 with H0 being the null model of a strict clock and a constant population size. Complex population size models have an absolute Bayes factor difference of less than two to the basic model. For the exponential growth model (model 2), the growth rate is estimated as -0.032 [-0.11,0.040]. This interval includes 0, thus the data is compatible with constant population size. Non-strict clock models are clearly rejected in comparison to the strict clock model (Bayes Factor > 4). For the random local clock model (model 6), the rate indicator estimate is 0.48 [0,2] and the highest posterior probability is at zero rate changes, thus the data is compatible with a strict molecular clock. The random local clock model based on a partition of the core codon alignment supports a strict molecular clock for each codon position, since the rate indicator estimates are 0.88 [0,2] for position 1, 0.78 [0,2] for position 2 and 0.50 [0,2] for position 3.



**Table S3: Publicly available genomes for *L. lactis* phages of the 936 group.**

| <b>Accession</b> | <b>Phage</b> |
|------------------|--------------|
| AF009630         | bIL170       |
| AF011378         | sk1          |
| DQ054536         | P008         |
| DQ227763         | 712          |
| DQ227764         | jj50         |
| EU221285         | bIBB29       |
| FJ848881         | SL4          |
| FJ848882         | CB13         |
| FJ848883         | CB14         |
| FJ848884         | CB19         |
| FJ848885         | CB20         |
| GQ979703         | p2           |
| JQ740787         | ASCC191      |
| JQ740788         | ASCC273      |
| JQ740789         | ASCC281      |
| JQ740790         | ASCC284      |
| JQ740791         | ASCC287      |
| JQ740792         | ASCC310      |
| JQ740793         | ASCC324      |
| JQ740794         | ASCC337      |
| JQ740795         | ASCC356      |
| JQ740796         | ASCC358      |
| JQ740797         | ASCC365      |
| JQ740798         | ASCC368      |
| JQ740799         | ASCC395      |
| JQ740800         | ASCC397      |
| JQ740801         | ASCC406      |
| JQ740802         | ASCC454      |
| JQ740803         | ASCC460      |
| JQ740804         | ASCC465      |
| JQ740805         | ASCC473      |
| JQ740806         | ASCC476      |
| JQ740807         | ASCC489      |
| JQ740808         | ASCC497      |
| JQ740809         | ASCC502      |
| JQ740810         | ASCC506      |
| JQ740811         | ASCC527      |
| JQ740812         | ASCC531      |
| JQ740813         | ASCC532      |
| JQ740814         | ASCC544      |
| KC182542         | 340          |
| KC182543         | 645          |
| KC182544         | 936          |
| KC182545         | fd13         |
| KC182546         | jm2          |
| KC182547         | jm3          |
| KC182548         | P113G        |

| <b>Accession</b> | <b>Phage</b> |
|------------------|--------------|
| KC182549         | p272         |
| KC182550         | P475         |
| KC182551         | P680         |
| KC182552         | phi7         |
| KC522412         | CaseusJM1    |
| KM091442         | phi15        |
| KM091443         | phi93        |
| KM091444         | phi145       |
| KP793101         | Phi4         |
| KP793102         | PhiA.16      |
| KP793103         | Phi19        |
| KP793104         | PhiB1127     |
| KP793105         | Phi19.3      |
| KP793106         | PhiA1127     |
| KP793107         | PhiD.18      |
| KP793108         | Phi5.12      |
| KP793109         | PhiC0139     |
| KP793110         | Phi43        |
| KP793111         | Phi19.2      |
| KP793112         | Phi129       |
| KP793113         | PhiF.17      |
| KP793114         | Phi17        |
| KP793115         | Phi114       |
| KP793116         | Phi13.16     |
| KP793117         | PhiG         |
| KP793118         | PhiF0139     |
| KP793119         | Phi10.5      |
| KP793120         | PhiL.18      |
| KP793121         | Phi109       |
| KP793122         | PhiL.6       |
| KP793123         | Phi4.2       |
| KP793124         | Phi44        |
| KP793125         | Phi91127     |
| KP793126         | PhiM.5       |
| KP793127         | Phi40        |
| KP793128         | PhiM.16      |
| KP793129         | PhiJF1       |
| KP793130         | Phi155       |
| KP793131         | PhiE1127     |
| KP793132         | PhiM1127     |
| KP793133         | PhiLj        |
| KP793134         | PhiS0139     |
| KP793135         | Phi.16       |

## References

- Bouchard JD, Moineau S. 2004. Lactococcal phage genes involved in sensitivity to AbiK and their relation to single-strand annealing proteins. *J. Bacteriol.* 186:3649–3652.
- De Paepe M, Hutinet G, Son O, Amarir-Bouhram J, Schbath S, Petit M-A. 2014. Temperate phages acquire DNA from defective prophages by relaxed homologous recombination: the role of Rad52-like recombinases. *PLOS Genet.* 10:e1004181.
- Hecht A, Glasgow J, Jaschke PR, Bawazer LA, Munson MS, Cochran JR, Endy D, Salit M. 2017. Measurements of translation initiation from all 64 codons in *E. coli*. *Nucleic Acids Res.* 45:3615–3626.
- Huson DH, Bryant D. 2006. Application of phylogenetic networks in evolutionary studies. *Mol. Biol. Evol.* 23:254–67.
- Lopes A, Amarir-Bouhram J, Faure G, Petit M-A, Guerois R. 2010. Detection of novel recombinases in bacteriophage genomes unveils Rad52, Rad51 and Gp2.5 remote homologs. *Nucleic Acids Res.* 38:3952–62.
- Mavrich TN, Hatfull GF. 2017. Bacteriophage evolution differs by host, lifestyle and genome. *Nat. Microbiol.* 2:17112.
- Murphy J, Bottacini F, Mahony J, Kelleher P, Neve H, Zomer A, Nauta A, van Sinderen D. 2016. Comparative genomics and functional analysis of the 936 group of lactococcal *Siphoviridae* phages. *Sci. Rep.* 6:21345.
- Scaltriti E, Launay H, Genois M-M, Bron P, Rivetti C, Grolli S, Ploquin M, Campanacci V, Tegoni M, Cambillau C, et al. 2011. Lactococcal phage p2 ORF35-Sak3 is an ATPase involved in DNA recombination and AbiK mechanism. *Mol. Microbiol.* 80:102–116.
